# Supplementary material
Source: Springer Nature journal article supplement (https://www.springermedizin.de/resource/supplementary/12891_2014_2396_MOESM4_ESM.pdf/9510106)

**A**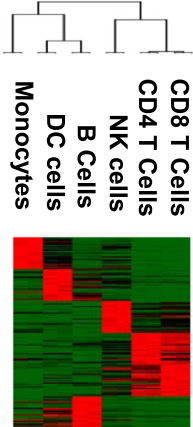**B**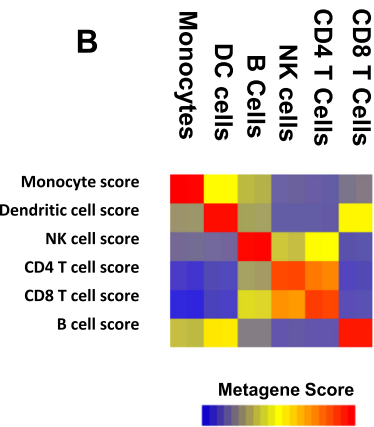**C**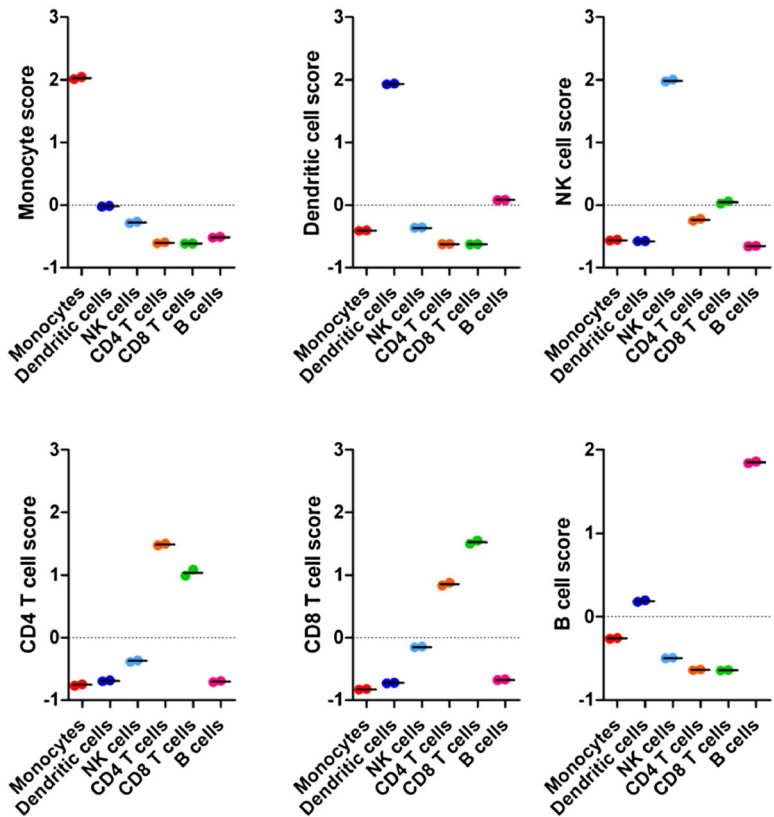

Supplement: MOESM4 [file 9510106]
